# Supplementary material for: Cerebrospinal fluid-derived circulating tumour DNA better represents the genomic alterations of brain tumours than plasma
Source: PubMed Central journal article supplement (PMC5426516; doi:10.1038/ncomms9839), 2015-11-10
Supplement: ncomms9839-s1.pdf [file ncomms9839-s1.pdf]

# Supplementary Information

## Supplementary Figure 1

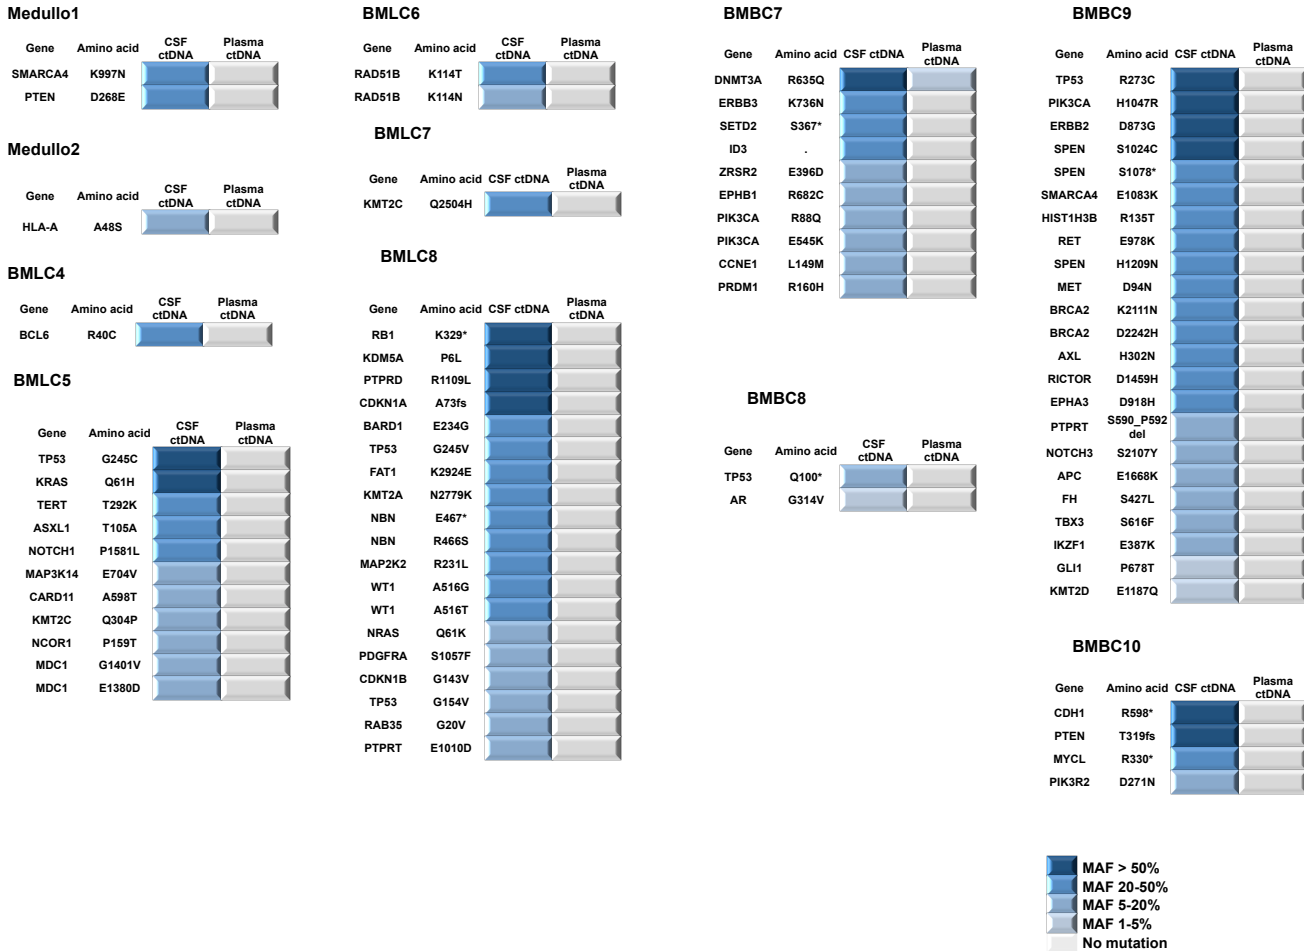

**Supplementary Figure 1.** Expansion cohort comparing CSF ctDNA and plasma ctDNA collected simultaneously in patients with brain tumors. Heatmap of the non-silent genetic alterations from each of the cases is shown. Color key for mutant allelic frequencies (MAFs) is represented.

## Supplementary Figure 2

**a**  
**GBM3**

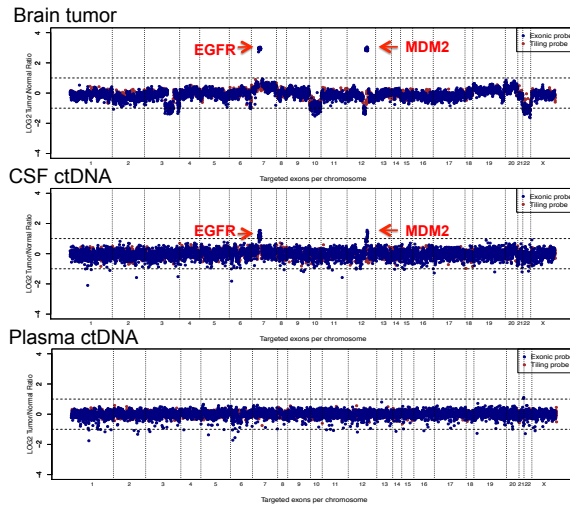

**b**  
**BMBC5**

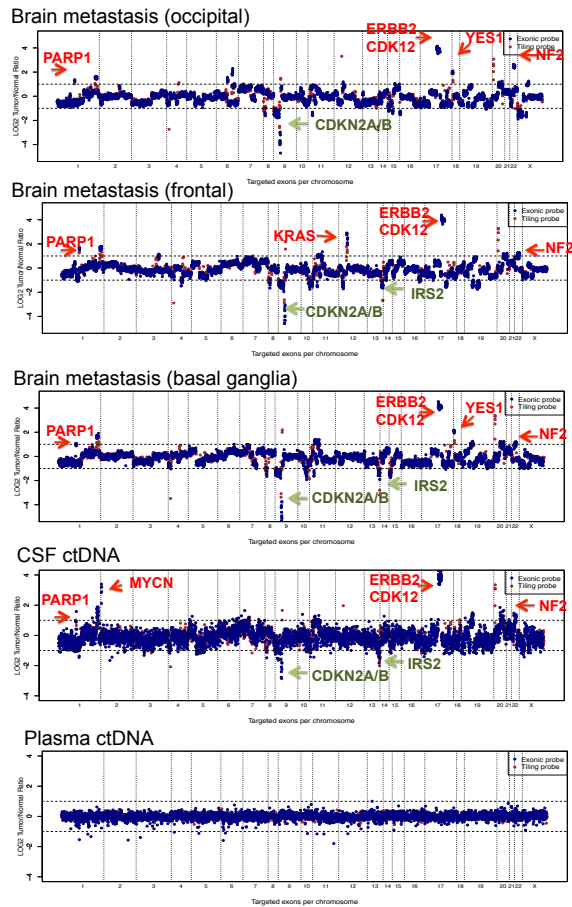

**Supplementary Figure 2.** Gene copy number alterations across the brain tumor, CSF, plasma which were collected simultaneously in **(a)** a patient with glioblastoma **(b)** a patient with brain metastasis from breast cancer (BMBC). Note that plasma ctDNA did

not play a role in such patients with minimal or absent CNS disease.

### Supplementary Figure 3

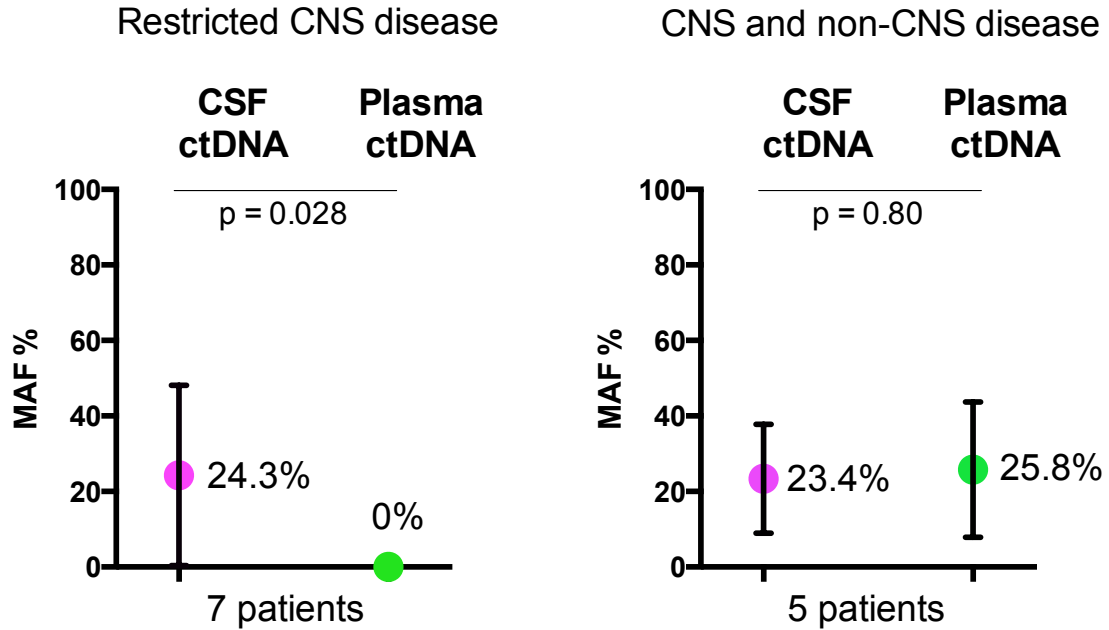

**Supplementary Figure 3.** Comparison of the mutant allelic frequencies (MAF) of CSF ctDNA and plasma ctDNA in CNS restricted disease and CNS and non-CNS disease. Data were pooled and the mean with SD error bars is shown (Mann-Whitney test).

## Supplementary Figure 4

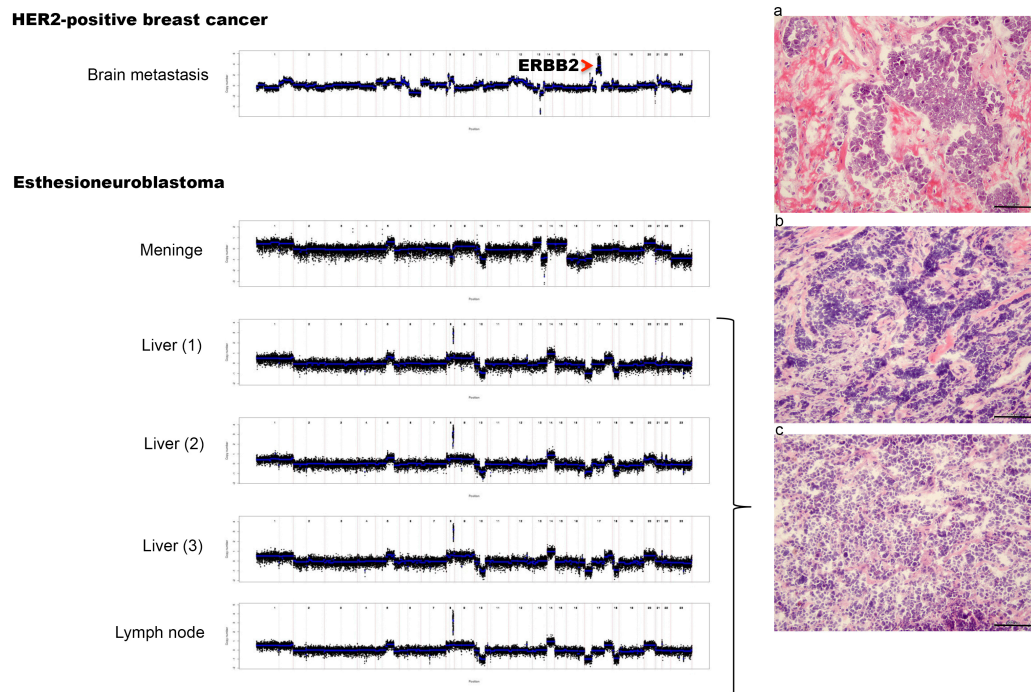

**Supplementary Figure 4.** Genomic analysis of a patient with Li Fraumeni syndrome and a diagnosis of both HER2-positive metastatic breast cancer and esthesioneuroblastoma (BMBC3). The brain metastasis was inferred to be originated from the HER2-positive metastatic breast cancer, as *ERBB2* gene copy amplification is shown at the genomic position 17q12. Micrographs representing (a) brain metastasis; (b) meninges; (c) liver metastasis. Scale bar = 500  $\mu$ m

**Supplementary Table 1.** Patients' clinical details.

| <b>Case</b> | <b>Tumor type</b>        | <b>Biopsy site</b>                  | <b>Clinical summary</b>                                                                                                                                                                                                                                                                                                                                                                                                                                                                                                                                     |
|-------------|--------------------------|-------------------------------------|-------------------------------------------------------------------------------------------------------------------------------------------------------------------------------------------------------------------------------------------------------------------------------------------------------------------------------------------------------------------------------------------------------------------------------------------------------------------------------------------------------------------------------------------------------------|
| GBM1        | Glioblastoma             | Brain tumor (secondary GBM)         | 33 year-old woman with diffuse low-grade astrocytoma in the right frontal and temporal lobes. The patient was operated and received chemotherapy and WBRT. After 5 years free of disease, she developed neurologic symptoms and had documented recurrence on MRI. Following treatment with temozolomide, she progressed later on and she was subjected to partial resection of the brain tumor, which showed evidence of secondary glioblastoma, IDH1 positive. Patient had fast clinical deterioration and received palliative care until she passed away. |
| GBM2        | Glioblastoma             | Primary brain tumor                 | 52 year-old man with diagnosis of glioblastoma. Following partial resection of the brain tumor, patient received WBRT plus concomitant and adjuvant temozolomide. He progressed months later as observed on MRI. After clinical deterioration, he received palliative care until he passed away.                                                                                                                                                                                                                                                            |
| GBM3        | Glioblastoma             | Primary brain tumor                 | 64 year-old woman with diagnosis of temporal glioblastoma (IDH1 negative, <i>EGFR</i> mutant). She was subjected to partial resection of the brain tumor. Then, she was treated with a targeted therapy plus temozolomide, concomitantly with WBRT.                                                                                                                                                                                                                                                                                                         |
| GBM4        | Glioblastoma             | Primary brain tumor (secondary GBM) | 54 year-old man with anaplastic astrocytoma. The tumor was subjected to suboptimal exeresis and the patient received chemotherapy and WBRT. After 12 months, a new exeresis was performed which showed evidence of secondary glioblastoma. Patient received a new line of chemotherapy, and upon progression, was enrolled in a clinical trial. Patient had no clinical benefit and passed away.                                                                                                                                                            |
| BMBC1       | Metastatic breast cancer | Brain metastasis                    | 56 year-old woman diagnosed with ductal invasive ER-positive, HER2-negative early breast cancer (T2N0M0).                                                                                                                                                                                                                                                                                                                                                                                                                                                   |

|       |                          |                                         |                                                                                                                                                                                                                                                                                                                                                                                                                                                                                                                                                                                                                                                                                                                       |
|-------|--------------------------|-----------------------------------------|-----------------------------------------------------------------------------------------------------------------------------------------------------------------------------------------------------------------------------------------------------------------------------------------------------------------------------------------------------------------------------------------------------------------------------------------------------------------------------------------------------------------------------------------------------------------------------------------------------------------------------------------------------------------------------------------------------------------------|
|       |                          |                                         | <p>After 10 years, she developed bone metastasis. She received multiple lines of treatments with stable disease for 33 months when she presented neurologic symptoms. Following MRI and serial cytological spinal fluid examination, a diagnosis of leptomeningeal carcinomatosis was established and WBRT was administered. Further disease progression in the brain was observed and the patient was enrolled in a palliative care program due to poor performance status.</p>                                                                                                                                                                                                                                      |
| BMBC2 | Metastatic breast cancer | Meningeal implants                      | <p>35 year-old woman diagnosed with ductal invasive ER-positive, HER2-negative breast cancer (T1cN0M0) in 2007. She had breast conservative surgery and received standard adjuvant therapy. In 2010, a biopsy confirmed bone metastasis and the patient received endocrine-based therapy and local RT. After multiple lines of endocrine, chemotherapy and targeted therapy due to bone and lung progression, the patient developed neurologic symptoms. Signs of leptomeningeal carcinomatosis were detected on the MRI but three serial spinal fluid cytological analyses were negative. After WBRT and a new line of chemotherapy, visceral disease progression was observed.</p>                                  |
| BMBC3 | Metastatic breast cancer | Brain metastasis and meningeal implants | <p>33 year-old woman diagnosed with ductal invasive carcinoma ER-positive, HER2-positive breast cancer (cT2N2M1) in 2006. The patient received first-line therapy with the anti-HER2 trastuzumab and chemotherapy, achieving almost complete response. After bone progression, she received multiple lines of trastuzumab combined with endocrine or chemotherapy. Subsequently, a diagnosis of Li-Fraumeni syndrome (germline <i>TP53</i> mutation) was confirmed. In 2009, she presents disease progression in CNS, bone and breast received WBRT and was treated with targeted therapies. In 2012, due to a right nasal cavity mass and palpable cervical lymph node, a diagnosis of a secondary primary tumor</p> |

|       |                          |                    |                                                                                                                                                                                                                                                                                                                                                                                                                                                                                                                                                                                      |
|-------|--------------------------|--------------------|--------------------------------------------------------------------------------------------------------------------------------------------------------------------------------------------------------------------------------------------------------------------------------------------------------------------------------------------------------------------------------------------------------------------------------------------------------------------------------------------------------------------------------------------------------------------------------------|
|       |                          |                    | (esthesioneuroblastoma) was made and the patient received local RT combined with cisplatin and etoposide. Further disease progression was observed in brain, bone (a biopsy was done and had HER2-positive status) and visceral sites and the patient received further lines with cytotoxic agent and anti-HER2 therapy.                                                                                                                                                                                                                                                             |
| BMBC4 | Metastatic breast cancer | Meningeal implants | 43 year-old woman diagnosed with locally advanced ductal invasive ER-positive, HER2-positive breast cancer (cT4bN2M0) in 2006. After neoadjuvant chemotherapy, patient was submitted to mastectomy, adjuvant endocrine treatment, and trastuzumab. In 2009, she developed bone and liver metastases and received several lines of anti-HER2-based systemic therapies, including a targeted therapy and trastuzumab. After presenting mentonian paresthesias, leptomeningeal carcinomatosis was clinically diagnosed and treated with WBRT. Two months after the patient passed away. |
| BMBC5 | Metastatic breast cancer | Brain metastasis   | 36 year-old woman diagnosed with invasive ductal carcinoma ER-negative, HER2-positive breast cancer (cT3N3M1) in 2012. The patient received first-line therapy with the anti-HER2 trastuzumab plus paclitaxel; following successive visceral and brain progression (2013), patient received WBRT and more 3 lines of anti-HER2 therapies combined with cytotoxic and targeted agents until she passed away in 2014.                                                                                                                                                                  |
| BMBC6 | Metastatic breast cancer | Brain metastasis   | 37 year-old woman diagnosed with invasive ductal carcinoma ER-positive (pT2N1M0) in 1993. She had a mastectomy and received standard adjuvant therapy. In 1995, bone metastasis was diagnosed and the patient received endocrine-based therapy and local RT. In 2013, after multiple lines of endocrine, chemotherapy and targeted therapy due to bone and hepatic progression, the patient developed neurologic symptoms. A brain MRI confirmed the diagnosis of brain metastases and WBRT                                                                                          |

|       |                            |                  |                                                                                                                                                                                                                                                                                                                                                                                                                                                                                                                                                                                                                                                                                                                                                                                                                                                                                                                                                                                                                             |
|-------|----------------------------|------------------|-----------------------------------------------------------------------------------------------------------------------------------------------------------------------------------------------------------------------------------------------------------------------------------------------------------------------------------------------------------------------------------------------------------------------------------------------------------------------------------------------------------------------------------------------------------------------------------------------------------------------------------------------------------------------------------------------------------------------------------------------------------------------------------------------------------------------------------------------------------------------------------------------------------------------------------------------------------------------------------------------------------------------------|
|       |                            |                  | was administered. Patient received a new line of chemotherapy and passed away.                                                                                                                                                                                                                                                                                                                                                                                                                                                                                                                                                                                                                                                                                                                                                                                                                                                                                                                                              |
| BMLC1 | Non-small cell lung cancer | Brain metastasis | 36 year-old woman with non-small cell lung adenocarcinoma (stage IV, <i>EGFR</i> mutation). Patient was subjected to partial resection of thoracic disease (lobectomy and pleural implants) and received post-operative chemotherapy. Following new surgical intervention, received another post-operative chemotherapy. After disease progression, she received treatment with erlotinib. After two years, she developed neurologic symptoms and had documented progressive disease documented in brain MRI. She was subjected to incomplete resection of the left parietal-occipital brain metastasis, which harbored an activating <i>EGFR</i> mutation (exon 21) and carried on treatment with erlotinib. Following brain RT, and due to persistence of brain disease on MRI, patient was operated again. After two months, patient had evidence of progressive disease in mediastinum and was treated with targeted therapies. Patient had partial response in mediastinum and no evidence of recurrence in the brain. |
| BMLC2 | Non-small cell lung cancer | Brain metastasis | 69 year-old man with non-small cell lung adenocarcinoma. Patient was operated (pT2N2M0, <i>EGFR</i> and <i>ALK</i> negative) and kept in clinic-radiological follow up. Four months after, he developed neurologic symptoms and had documented progressive disease on brain MRI. He was subjected to complete resection of the left temporal brain metastasis, and further received WBRT, being disease free.                                                                                                                                                                                                                                                                                                                                                                                                                                                                                                                                                                                                               |
| BMLC3 | Non-small cell lung cancer | Brain metastasis | 65 year-old man with non-small cell lung adenocarcinoma (T4N3M0). The patient is treated with chemotherapy and radiotherapy, achieving complete response. Twelve months after, he developed neurologic symptoms and had documented progressive disease on brain MRI. He was subjected to complete resection of the cerebellar                                                                                                                                                                                                                                                                                                                                                                                                                                                                                                                                                                                                                                                                                               |



|  |  |  |                                       |
|--|--|--|---------------------------------------|
|  |  |  | brain metastasis, being disease free. |
|--|--|--|---------------------------------------|

Abbreviations: ALK, anaplastic lymphoma kinase; CNS, central nervous system; EGFR, epidermal growth factor receptor; ER, estrogen receptor, GBM, glioblastoma; MRI, magnetic resonance imaging; WBRT, whole brain radiotherapy.

**Supplementary Table 2.** Expansion cohort of patients in which CSF ctDNA and plasma ctDNA are compared.

| <b>Patient ID</b>                          | <b>Tumor Type</b>                                                 |
|--------------------------------------------|-------------------------------------------------------------------|
| <b>Brain metastasis from breast cancer</b> |                                                                   |
| <b>BMBC7</b>                               | Brain metastasis from ER-positive / HER2-negative breast cancer   |
| <b>BMBC8</b>                               | Brain metastasis from ER-negative / HER2-negative breast cancer   |
| <b>BMBC9</b>                               | Brain metastasis from ER-positive / HER2-negative breast cancer   |
| <b>BMBC10</b>                              | Brain metastasis from ER-positive / HER2-negative breast cancer   |
| <b>Brain metastasis from lung cancer</b>   |                                                                   |
| <b>BMLC4</b>                               | Non-small cell lung cancer (large cell carcinoma)                 |
| <b>BMLC5</b>                               | Non-small cell lung cancer (adenocarcinoma, <i>KRAS</i> mutation) |
| <b>BMLC6</b>                               | Non-small cell lung cancer (large cell carcinoma)                 |
| <b>BMLC7</b>                               | Non-small cell lung adenocarcinoma ( <i>ALK</i> translocation)    |
| <b>BMLC8</b>                               | Non-small cell lung adenocarcinoma                                |
| <b>Primary brain tumors</b>                |                                                                   |
| <b>Medullo1</b>                            | Medulloblastoma (classic type)                                    |
| <b>Medullo2</b>                            | Medulloblastoma (anaplastic type)                                 |

**Supplementary Table 3.** Validation rate of somatic mutations (SNVs and indels) affecting the exons of 107 genes present in both IMPACT and Breast Cancer platforms.

| <b>Case</b>    | <b>Validation rate of IMPACT (using breast panel as the validation set)</b> | <b>Validation rate of breast panel (using IMPACT as the validation set)</b> |
|----------------|-----------------------------------------------------------------------------|-----------------------------------------------------------------------------|
| <b>BMBC1</b>   | 90.9% (20/22)                                                               | 100% (20/20)                                                                |
| <b>BMBC2</b>   | 97.4% (37/38)                                                               | 100% (37/37)                                                                |
| <b>BMBC3</b>   | 100% (21/21)                                                                | 100% (21/21)                                                                |
| <b>BMBC4</b>   | 91.7% (11/12)                                                               | 100% (11/11)                                                                |
| <b>Overall</b> | 96.7 % (89/92)                                                              | 100% (89/89)                                                                |

**Supplementary Table 4.** Tumor burden of patients with central nervous system disease (CNS)-restricted disease and CNS and non-CNS (disseminated disease).

| Case                  | Site of metastases | Lesions on last imaging scans                                                                                                                         |
|-----------------------|--------------------|-------------------------------------------------------------------------------------------------------------------------------------------------------|
| <b>CNS restricted</b> |                    |                                                                                                                                                       |
| <b>GBM1</b>           | CNS                | Lesion in the right frontal lobe (55x60mm)                                                                                                            |
| <b>GBM2</b>           | CNS                | Lesion in the corpus callosum (39x16x19 mm).                                                                                                          |
| <b>GBM3</b>           | CNS                | Lesion in the left temporal lobe (50x28 mm).                                                                                                          |
| <b>GBM4</b>           | CNS                | Right parieto-occipital mass (85x58x53 mm).                                                                                                           |
| <b>BMBC1</b>          | CNS                | Right thalamic mass (5.6 x 4.2mm), meningeal implants (not measurable).                                                                               |
|                       | Non-CNS            | Mild pleural, pericardial implants and bone metastasis (not measurable).                                                                              |
| <b>BMBC5</b>          | CNS                | Multiple supra and infratentorial brain metastases: left frontal (15x19 mm), right parietal (13x24mm), basal ganglia (12x10 mm), occipital (10x8 mm). |
|                       | Non-CNS            | Hepatic subcentimeter lesion in segment IV.                                                                                                           |
| <b>BMLC3</b>          | CNS                | Pre-surgical cerebellar brain metastasis (37x33x34 mm).                                                                                               |
|                       | Non-CNS            | No evidence of thoracic disease.                                                                                                                      |

| <b>CNS and non-CNS (disseminated disease)</b> |          |                                                                                                                                                                                                                           |
|-----------------------------------------------|----------|---------------------------------------------------------------------------------------------------------------------------------------------------------------------------------------------------------------------------|
| <b>BMBC2</b>                                  | CNS      | Meningeal implants in left and right parietal convexity.                                                                                                                                                                  |
|                                               | Non-CNS  | Liver with about 60-70% of the parenchyma involved with metastasis (greater lesions: 43x40mm and 27x27mm, liver longer axis 27cm), pleural and abdominal effusion and multiple bone metastases (not measurable).          |
| <b>BMBC3</b>                                  | CNS      | Left temporo-occipital (30x16mm), right frontal (7x6 mm), extra-parenchymatous falx cerebri (10x11mm), esphenoidal lesion (not measurable).                                                                               |
|                                               | Non- CNS | Moderate left pleural effusion, hepatic subcentimeter lesion in segment II, multiple bone metastases (not measurable).                                                                                                    |
| <b>BMBC4</b>                                  | CNS      | Meningeal implants in brain and cervical spinal cord (not measurable).                                                                                                                                                    |
|                                               | Non-CNS  | Liver (21x18mm, 15x21mm, 39x15mm, 29x22mm, and others - longer axis 21cm, 30-40% parenchyma involved), para-tracheal lymph node (8x7mm), peri-pancreatic lymph node (13x10mm), multiple bone metastases (not measurable). |
| <b>BMBC6</b>                                  | CNS      | Pre and post central gyrus lesions (18x18 mm), multiple left fronto-parietal gyrus lesions, posterior fossa (vermis lesion 3 mm).                                                                                         |
|                                               | Non-CNS  | Multiple liver metastases: segment V/VIII (69x55 mm), segment IV (59x43 mm), segment III (18x17mm). Peritoneal implants and multiple bone metastases (not measurable).                                                    |
| <b>BMLC1</b>                                  | CNS      | Left parieto-temporal brain lesion (32x23x26 mm) and left parieto-occipital lesion (27x14 mm).                                                                                                                            |
|                                               | Non-CNS  | Pulmonary lesion in left upper lobe (5.8x4 mm).                                                                                                                                                                           |

**Supplementary Table 5.** Analysis of sensitivity for central nervous system (CNS) and non-CNS disease, CSF ctDNA and plasma ctDNA.

| <b>CNS restricted</b>                         |                   |                                    |                                 |                               |                                  |
|-----------------------------------------------|-------------------|------------------------------------|---------------------------------|-------------------------------|----------------------------------|
|                                               | <b>MSK-IMPACT</b> | <b>MSK-IMPACT and breast panel</b> | <b>N of all SNVs and indels</b> | <b>Present in CSF and CNS</b> | <b>Present in plasma and CNS</b> |
| <b>GBM1</b>                                   | Yes               |                                    | 5                               | 1/3<br>(33.3%)                | 0/3<br>(0%)                      |
| <b>GBM2</b>                                   | Yes               |                                    | 3                               | 1/3<br>(33.3%)                | 0/3<br>(0%)                      |
| <b>GBM3</b>                                   | Yes               |                                    | 1                               | 1/1<br>(100%)                 | 0/1<br>(0%)                      |
| <b>GBM4</b>                                   | Yes               |                                    | 4                               | 1/2<br>(50%)                  | 0/2<br>(0%)                      |
| <b>BMBC1</b>                                  |                   | Yes                                | 21                              | 6/7<br>(85.7%)                | 0/7<br>(0%)                      |
| <b>BMBC5</b>                                  | Yes               |                                    | 15                              | 4/15<br>(26.6%)               | 0/15<br>(0%)                     |
| <b>BMLC3</b>                                  | Yes               |                                    | 9                               | 7/9<br>(77.8%)                | 0/9<br>(0%)                      |
| <b>Mean</b>                                   |                   |                                    | 8.4                             | 58%                           | 0%                               |
| <b>CNS and non-CNS (disseminated disease)</b> |                   |                                    |                                 |                               |                                  |
| <b>BMBC2</b>                                  |                   | Yes                                | 28                              | 6/16<br>(37.5%)               | 6/16<br>(37.5%)                  |
| <b>BMBC3</b>                                  |                   | Yes                                | 17                              | 6/16<br>(100%)                | 3/16<br>(50%)                    |
| <b>BMBC4</b>                                  |                   | Yes                                | 16                              | 3/5<br>(60%)                  | 5/5<br>(100%)                    |
| <b>BMBC6</b>                                  | Yes               |                                    | 18                              | 8/10<br>(80%)                 | 9/10<br>(90%)                    |
| <b>BMLC1</b>                                  | Yes               |                                    | 4                               | 1/4<br>(25%)                  | 0/4<br>(0%)                      |
| <b>Mean</b>                                   |                   |                                    | 16.6                            | 60.5%                         | 55.5%                            |

**Supplementary Table 6.** Tumor volume measurements as per computer aided planimetric analyses.

| <b>Patient ID</b> | <b>Volume of brain lesions (cm<sup>3</sup>)</b> |                     |
|-------------------|-------------------------------------------------|---------------------|
|                   | <b>Time Point 1</b>                             | <b>Time Point 2</b> |
| <b>GBM1</b>       | 82.24                                           | 70.32               |
| <b>GBM2</b>       | N/A                                             | 8.98                |
| <b>GBM3</b>       | 49.36                                           | 4.7                 |
| <b>BMLC1</b>      | 20.99                                           | 0                   |
| <b>BMLC2</b>      | 6.71                                            | 0                   |

Abbreviation: N/A, not available.

**Supplementary Table 7.** Gene mutations and their respective mutant allelic frequencies in the CSF ctDNA and plasma ctDNA as determined per digital PCR.

| Case                  | Gene     | Amino acid Change | CSF 1               | CSF 2          | Plasma 1       | Plasma 2        |
|-----------------------|----------|-------------------|---------------------|----------------|----------------|-----------------|
| <b>GBM1</b>           | IDH1     | R132H             | 21.8%               | 22.7%          | 0.0%           | N/A             |
|                       | TP53     | R114C             | 40.0%               | 42.0%          | 0.0%           | N/A             |
|                       | ANK2     | K2337X            | 30.0%               | 27.2%          | 0.0%           | N/A             |
| <b>GBM2</b>           | EGFR     | C620S             | 2.9%                | N/A            | 0.4%           | N/A             |
|                       | PTEN     | D162V             | 0.8%                | N/A            | 0.0%           | N/A             |
| <b>GBM3</b>           | EGFR     | R108K             | 92.6%               | 0.0%           | 0.3%           | 0.0%            |
|                       | FTH1     | I146T             | 2.0%                | 0.0%           | 0.0%           | 0.0%            |
|                       | OR51D1   | R135C             | 17.0%               | 0.0%           | 0.0%           | 0.0%            |
| <b>BMBC1</b>          | POLE     | E318K             | 22.8%               | 70.9%          | 10.7%          | 1.0%            |
|                       | ARID5B   | E572K             | 22.2%               | 30.9%          | 9.8%           | 2.0%            |
|                       | PCDH1    | S190C             | 38.8%               | 77.9%          | 13.6%          | 2.0%            |
| <b>BMLC1</b>          | CD9      | W22L              | 0.2%                | 0.0%           | 0.0%           | 0.2%            |
|                       | EGFR     | L858R             | 0.1%                | 0.0%           | 0.0%           | 0.0%            |
| <b>BMLC2</b>          | ADAMTS12 | T982K             | 15.5%               | 0.0%           | 0.0%           | 0.2%            |
|                       | AHRR     | G353C             | 20.8%               | 0.0%           | 0.0%           | 0.0%            |
| <b>Median (range)</b> | -        | -                 | 20.8%<br>(0.1-92.6) | 0%<br>(0-77.9) | 0%<br>(0-13.6) | 0.1%<br>(0-2.0) |

Abbreviation: N/A, not available.



**Supplementary Table 8.** List of primers and probes used for ddPCR

| Gene     | Aminoacid change | Forward primer               | Reverse primer                         | Variant probe (FAM)   | Reference probe (VIC) |
|----------|------------------|------------------------------|----------------------------------------|-----------------------|-----------------------|
| IDH1     | R132H            | CTTGTGAGTGGATGGGTAAAACCTA    | CCAACATGACTTACTTGATCCCCATA             | ATCATAGGTCATCATGC     | CATCATAGGTCGTCATGC    |
| EGFR     | C620S            | ACGCCGGCCATGTGT              | ACTTTCCACTCACCCGTAGGT                  | CACCTGAGCCATCC        | CCACCTGTGCCATCC       |
| EGFR     | R108K            | CAGTGGAGCGAATTCCTTTGGA       | ACTGCTAAGGCATAGGAATTTTCGT              | CAGATCATCAAAGGAAAT    | CAGATCATCAGAGGAAAT    |
| POLE     | E318K            | CTCATCACCAACAGGGAGATTGT      | CGGGTTCATTGAAGACACAAAAGG               | CAGAAGATATTAAGATTTT   | CAGAAGATATTGAAGATTTT  |
| PTEN     | Y240X            | ACACGACGGGAAGACAAGTT         | TGATATCACACACACAGTAACG                 | AGGGAACCTCAAACATACATG | AGGGAACCTCAAAGTACATG  |
| AHRR     | G353C            | CCCTCTAAACCCCAACAGGAA        | GGCCAGCGTCAGTCTGTT                     | AGAGAGAGCTGCGTTTT     | AGAGAGCGGCGTTTT       |
| CDC73    | A418V            | AGAAGAAAAGACCAGATGCAACCA     | GGGTGCTACTACTCTATAAGGT                 | AACACTAATTACAGTGCCC   | ACTAATTGCAGTGCCC      |
| CD9      | W22L             | CAAGTGCATCAAATACCTGCTGTTT    | ACAGGTGGGCCCTGAGA                      | CCTCATCTTCTGGTGAGTG   | CCTCATCTTCTGGGTGAGTG  |
| ADAMTS12 | T982K            | TGCCAAGAACCATGATGAACCTT      | GCTGGAGGCCACACAGA                      | TTGGGTTTCCTTTTCACATC  | TTGGGTTTCCTTGTACATC   |
| HERC2    | R2235C           | GTTATGCACGATGAGTTTGGAGAAG    | CACGGTGATTTGCCCTTTGG                   | CACTGTGACTTGCATCA     | CACTGTGACTCGCATCA     |
| FTH1     | I146T            | GTGACTTCATTGAGACACATTACCTGAA | GCTCCCATCTTGCGCAAGT                    | CAATTCCTTGGTGGCTTT    | CCAATTCCTTGTGGCTTT    |
| PTEN     | D162V            | CACAAGAGGCCCTAGATTTCTATGG    | CAGATCCAGGAAGAGGAAAGAAAA               | ACCAGAGTCAAAAAG       | ACCAGAGACAAAAAG       |
| ANK2     | K2337X           | CAGGCAGCTGTAGTGTAGCA         | GCTGCCTCCTCAGTCAGT                     | AGGTGTCTCTTAAGCTAA    | TGTAGGTGTCTCTTAGCTAA  |
| ESR1     | Y537N            | CTGTACAGCATGAAGTGAAGAAC      | TGGGCGTCCAGCATCTC                      | TGCCCTCAATGAC         | TGGTGCCCTCTATGAC      |
| TP53     | R114C            | CTACTGGGACGGAACAGCTT         | CTGTGCGCCGGTCTCT                       | CACAAACACACACCTCA     | CACAAACACGCACCTCA     |
| MRPS33   | P94T             | ACGACTAAAGAAGCTTCGTGGAAAG    | TTGAGGGACCAACTATTTCCTTTT               | CCTTTCTTTGTTTCTC      | CCTTTCTTTGGTTTCTC     |
| EGFR     | L858R            | GCAGCATGTCAAGATCACAGATT      | CCTCCTTCTGCATGGTATTCTTTCT              | AGTTTGGCCCGCCCAA      | AGTTTGGCCAGCCCAA      |
| OR51D1   | R135C            | CCTGCTGGCCATGGCT             | CGCAATGGGTGGCAATGG                     | CCCAAAGCAGTCAAA       | CCCAAAGCGGTCAAA       |
| ARID5B   | E572K            | TCCTACGTCTGAAGCAAGAAATTC     | AGCTAGGCATGTGGGAATGG                   | AGGATAAACTCTTAAGAAAA  | AAGGATAAACTCTTAGAAAA  |
| PCDH1    | S190C            | TCACCCGAGACTGGAGAGATC        | CTCATAGCTCTCCCGCTGTTT                  | CGATCCAGACATGTCT      | CGATCCAGAGATGTCT      |
| AKT3     | Q425H            | TCTTTCTTTTACAGCTTGACCTCCTT   | TGTAATAGTCTGAGCTGTAATTCCTT<br>CATCAAAA | CAGATGTTACGTGAGGTT    | TCTCAGATGTTACTTGAGGTT |
